# Supplementary material for: Dietary Intake Is Unlikely to Explain Symptom Severity and Syndrome-Specific Microbiome Alterations in a Cohort of Women with Fibromyalgia
Source: MDPI journal article supplement (doi:10.3390/ijerph19063254), 2022-03-10
Supplement: s1 [file s1]

## Supplementary figures

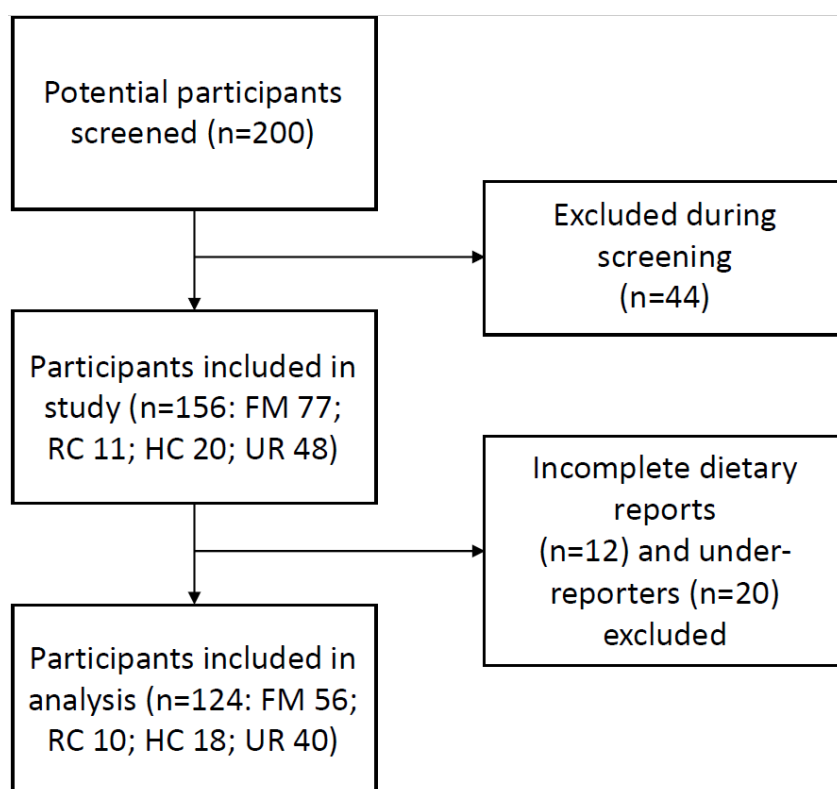

Supplementary Figure S1: Consort diagram of the study.

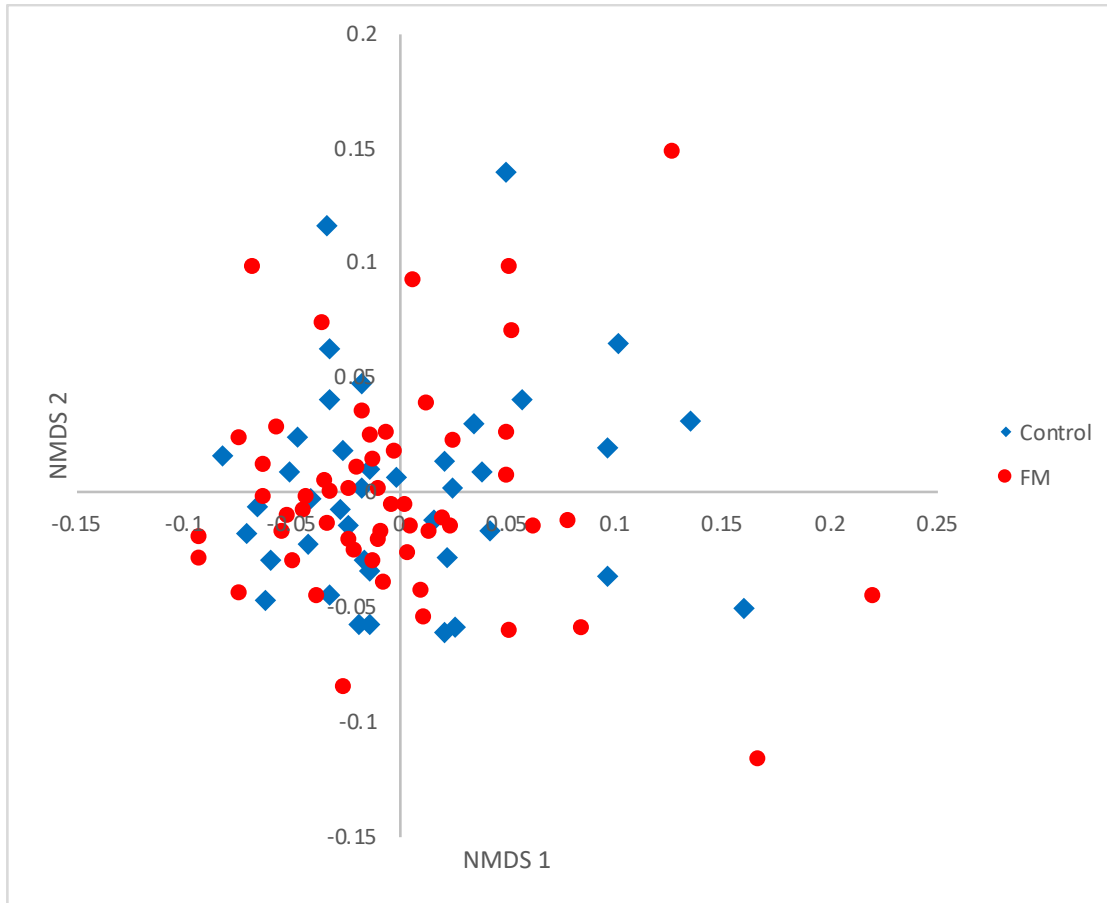

**Supplementary figure S2: Non-metric multidimensional scaling (NMDS) analysis.** Daily macro- and micronutrient intake among fibromyalgia patients (red circles) vs. all controls (blue diamonds). Control and fibromyalgia factors were projected onto a NMDS diagram and tested by Monte Carlo permutation test (envfit function, R Vegan package). No significant between-group difference was observed ( $R^2=0.001$ ,  $p=0.88$ ).

**Supplementary Table S1: Fibromyalgia related variables.** Years since diagnosis, co-diagnosis of IBS, disease severity and quality of life metrics based on the 2016 fibromyalgia Diagnostic Criteria Widespread Pain Index and Symptom Severity Scale, and on the fibromyalgia Impact Questionnaire (mean $\pm$ SD or % as indicated). \* indicates a significant ( $p<0.05$ ) difference between fibromyalgia and all control groups; \*\* indicates a significant ( $p<0.05$ ) difference between fibromyalgia and HM + UC.

|                              | FM <sub>(56)</sub> | First degree Household relatives (10) | Unrelated members (18) | controls (40) | ANOVA p |
|------------------------------|--------------------|---------------------------------------|------------------------|---------------|---------|
| Years since diagnosis        | 11.8 $\pm$ 9.7     | 0                                     | 0                      | 0             |         |
| Irritable bowel syndrome     | 48% *              | 10%                                   | 5.6%                   | 2.5%          | <0.0001 |
| Widespread pain index (0-15) | 10.3 $\pm$ 3.3*    | 1.8 $\pm$ 2.5                         | 2.0 $\pm$ 1.3          | 1.2 $\pm$ 1.3 | <0.0001 |
| Fatigue (0-3)                | 2.6 $\pm$ 0.6*     | 0.9 $\pm$ 0.7                         | 1.0 $\pm$ 0.7          | 0.6 $\pm$ 0.7 | <0.0001 |
| Waking unrefreshed (0-3)     | 2.3 $\pm$ 0.7*     | 1.2 $\pm$ 0.9                         | 0.9 $\pm$ 0.7          | 0.5 $\pm$ 0.8 | <0.0001 |

|                 |                                      |           |         |         |         |         |
|-----------------|--------------------------------------|-----------|---------|---------|---------|---------|
|                 | Cognitive symptoms (0-3)             | 2.1±0.8*  | 0.7±0.9 | 0.8±0.7 | 0.2±0.4 | <0.0001 |
|                 | Headaches                            | 86%**     | 60%     | 56%     | 43%     | <0.0001 |
|                 | Abdominal pain                       | 84%*      | 30%     | 33%     | 20%     | <0.0001 |
|                 | Depression                           | 59%*      | 30%     | 17%     | 18%     | <0.0001 |
|                 | Total symptom severity score (0-12)  | 9.2±1.8*  | 4.0±3.1 | 3.7±1.9 | 2.2±1.8 | <0.0001 |
| Quality of life | Ability to perform tasks (sum, 0-44) | 14.5±6.7* | 3.9±6.6 | 4.9±9.6 | 2.9±4.4 | <0.0001 |
|                 | Days felt well                       | 1.8±1.8*  | 5.3±2.1 | 5.9±1.7 | 6.7±0.6 | <0.0001 |
|                 | Days missed work                     | 0.84±1.6* | 0       | 0       | 0       | 0.0001  |
|                 | Difficulty working (0-10)            | 4.4±3.2*  | 0.4±1.3 | 0.3±0.8 | 0.0±0.2 | <0.0001 |
|                 | Pain intensity (0-10)                | 6.7±2.0*  | 2.4±2.9 | 1.3±1.6 | 0.5±0.9 | <0.0001 |
|                 | Felt tired (0-10)                    | 7.5±2.1*  | 3.3±2.8 | 2.7±2.1 | 1.5±1.8 | <0.0001 |
|                 | Unrefreshed sleep (0-10)             | 7.1±2.3*  | 2.4±2.5 | 3.1±2.1 | 1.3±1.5 | <0.0001 |
|                 | Stiffness (0-10)                     | 7.3±2.0*  | 2.2±3.0 | 2.8±2.9 | 0.5±1.1 | <0.0001 |
|                 | Felt anxious (0-10)                  | 5.6±2.7*  | 2.3±2.9 | 3.2±2.7 | 0.8±1.8 | <0.0001 |
|                 | Felt depressed (0-10)                | 4.9±2.8*  | 2.1±2.7 | 1.3±2.0 | 0.5±1.2 | <0.0001 |

**Supplementary Table S2: Nutritional supplements taken by study participants categorized by classes.** Supplements taken by 5% of participants or more are shown. No significant differences were observed following Bonferroni correction for multiple comparisons.

|                             |         | First degree Household |              |                         | ANOVA p |
|-----------------------------|---------|------------------------|--------------|-------------------------|---------|
|                             | FM (56) | relatives (10)         | members (18) | Unrelated controls (40) |         |
| All nutritional supplements | 70%     | 40%                    | 0%           | 35%                     | 0.1     |
| Vitamin D                   | 16%     | 20%                    | 0%           | 3%                      | 0.04    |
| Calcium                     | 11%     | 10%                    | 0%           | 0%                      | 0.09    |
| Curcumin                    | 0%      | 0%                     | 0%           | 5%                      | 0.24    |
| Iron                        | 3.6%    | 0%                     | 0%           | 12.5%                   | 0.13    |
| Magnesium                   | 8.9%    | 0%                     | 0%           | 2.5%                    | 0.27    |
| Vitamin B12                 | 3.6%    | 10%                    | 0%           | 0%                      | 0.25    |
| Vitamin C                   | 7.1%    | 0%                     | 0%           | 0%                      | 0.17    |
